# Supplementary material for: Olanzapine enhances the response of PD-(L)1 inhibitor immunotherapy: A retrospective efficacy analysis in advanced malignancies
Source: Research Square preprint supplement (doi:10.21203/rs.3.rs-8497529/v1), 2026-01-16
Supplement: Supplementary file 1 [file aa9a6d8356963a9451842593.xlsx]

## Sheet: Sheet1
Patient No.	Group	OS	Status	OS	OS status	PFS	PFS status	Age	BMI	PS	Species	Smoking	Dunk
1	1	2	1	2	1	2	1	65	22.7204	1	1	1	1
2	1	10	0	10	0	10	0	60	21.4533	1	3	1	0
3	1	8	0	8	0	8	0	73	20.0692	1	3	0	0
4	1	8	1	8	1	6	1	78	17.7086	1	3	0	0
5	1	22	0	22	0	4	1	65	21.3039	1	3	0	0
6	1	2	1	2	1	2	1	78	22.0386	1	1	0	0
7	1	34	0	34	0	34	1	54	23.3377	1	3	0	0
8	1	30	0	30	0	30	0	63	22.3478	1	1	0	0
9	1	4	1	4	1	4	1	72	23.6832	1	2	0	0
10	1	6	0	6	0	6	0	39	21.9713	1	2	0	0
11	1	40	0	40	0	40	0	73	24.0569	1	1	1	1
12	1	17	1	17	1	9	1	72	20.1956	1	1	1	0
13	1	25	0	25	0	18	1	75	20.202	1	3	0	1
14	1	30	0	30	0	30	0	72	20.202	1	3	1	1
15	1	35	0	35	0	18	1	51	19.726	1	1	0	0
16	1	12	0	12	0	7	1	59	20.3223	1	1	1	1
17	1	6	0	6	0	2	1	63	23.5294	1	2	1	0
18	1	4	1	4	1	4	1	62	23.4375	1	1	0	0
19	1	5	1	5	1	2	1	75	20.3954	1	2	0	0
20	1	28	1	28	1	25	1	56	19.7232	1	1	0	0
21	1	7	0	7	0	7	0	44	25.5937	1	3	0	0
22	1	16	0	16	0	16	0	46	21.4844	1	3	0	0
23	1	8	1	8	1	1	1	74	18.6307	2	1	1	0
24	1	32	0	32	0	26	1	53	24.677	1	1	0	1
25	1	9	1	9	1	3	1	60	22.3214	1	1	1	0
26	1	6	1	6	1	1	1	64	22.0386	1	1	0	0
27	1	9	0	9	0	9	0	64	26.079	1	3	0	0
28	1	9	1	9	1	5	1	53	18.8189	1	3	0	0
29	1	3	1	3	1	3	1	56	17.3469	1	3	0	0
30	1	7	1	7	1	3	1	75	22	1	1	0	0
31	1	3	1	3	1	3	1	72	21.3039	1	1	0	0
32	1	16	0	16	0	16	0	69	19.2672	1	2	0	0
33	1	2	1	2	1	2	1	57	25.9516	1	2	0	0
34	1	6	1	6	1	6	1	53	24.0346	1	1	0	0
35	1	1	1	1	1	1	1	70	21.2585	1	1	0	0
36	1	33	0	33	0	19	1	48	27.8852	1	1	0	0
37	1	33	0	33	0	33	0	38	17.8201	1	3	0	0
38	1	31	0	31	0	31	0	47	23.0529	1	3	0	0
39	1	21	0	21	0	21	0	58	24.2424	1	2	0	0
40	1	16	0	16	0	16	0	66	23.7118	1	3	0	0
41	1	4	1	4	1	4	1	66	21.7555	1	2	1	1
42	2	3	1	3	1	3	1	60	22.4913	1	3	0	0
43	2	1	1	1	1	1	1	69	21.3039	2	1	1	1
44	2	7	1	7	1	6	1	57	19.6072	1	1	1	0
45	2	21	1	21	1	8	1	61	24.6914	0	3	1	1
46	2	2	1	2	1	2	1	48	20.8117	1	1	0	0
47	2	4	1	4	1	4	1	61	20.4491	1	1	0	0
48	2	3	1	3	1	3	1	52	24.6711	1	3	0	0
49	2	9	1	9	1	9	1	72	21.8724	1	3	1	0
50	2	10	1	10	1	1	1	75	20.8117	1	3	0	0
51	2	4	1	4	1	3	1	54	23.8754	1	1	0	0
52	2	8	1	8	1	5	1	55	25	1	2	0	0
53	2	8	1	8	1	8	1	77	19.7232	1	3	1	1
54	2	26	1	26	1	26	1	70	17.5278	1	1	0	1
55	2	6	1	6	1	1	1	67	20.3954	1	1	0	0
56	2	19	1	19	1	4	1	65	22.2041	1	1	1	0
57	2	10	1	10	1	6	1	34	19.6506	1	2	0	0
58	2	23	0	23	0	23	0	69	24.1415	1	3	1	0
59	2	21	0	21	0	21	0	48	22.6326	1	1	0	0
60	2	13	1	13	1	3	1	72	19.5312	1	1	0	0
61	2	20	0	20	0	11	1	59	22.0386	1	1	0	0
62	2	8	1	8	1	5	1	59	26.5625	1	3	0	0
63	2	22	0	22	0	22	1	65	23.4375	1	2	0	0
64	2	9	1	9	1	3	1	31	22.0386	1	2	0	1
65	2	22	1	22	1	5	1	50	25.2595	1	1	1	0
66	2	20	0	20	0	8	1	53	21.4844	1	3	0	0
67	2	9	0	9	0	6	1	60	22.3094	1	1	0	0
68	2	7	1	7	1	1	1	60	24.114	1	1	0	0
69	2	6	1	6	1	6	0	71	19.2336	2	2	0	0
70	2	6	0	6	0	6	0	71	17.898	1	2	1	1
71	2	1	1	1	1	1	0	59	18.6012	1	3	1	0
72	2	3	0	3	0	3	0	83	20.7612	1	3	0	0
73	2	7	0	7	0	7	1	55	18.4911	1	2	0	0
74	2	19	0	19	0	19	0	72	20.83	1	1	0	0
75	2	1	1	1	1	1	0	73	22.4766	1	1	0	0
76	2	18	1	18	1	13	1	64	18.424	0	3	0	1
77	2	7	1	7	1	2	1	38	25.9516	0	2	0	0
78	2	1	1	1	1	1	0	79	18.4911	1	1	0	0
79	2	8	1	8	1	4	1	50	22.4913	2	3	0	0
80	2	9	1	9	1	6	1	69	21.2306	2	3	0	0
81	2	9	0	9	0	9	0	75	23.6614	1	3	1	1
82	2	5	1	5	1	5	1	72	19.1001	1	3	0	0
